# Supplementary material for: Electrically stimulated liquid phase microextraction combined with differential pulse voltammetry: a new and efficient design for in situ determination of clozapine from complicated matrices
Source: Royal Society of Chemistry journal article supplement (doi:10.1039/c5ra25157e), 2016-01-01
Supplement: c5ra25157e1.pdf [file c5ra25157e1.pdf]

## Supporting information

**Table 1S**

Experimental factors, levels and analysis of variance (ANOVA) table for response surface quadratic model.

| Factors               | Symbol | Levels |      |     |      |      |
|-----------------------|--------|--------|------|-----|------|------|
|                       |        | (-2)   | (-1) | (0) | (+1) | (+2) |
| Voltage (V)           | A      | 100    | 150  | 200 | 250  | 300  |
| Extraction time (min) | B      | 10     | 15   | 20  | 25   | 30   |
| pH; DP                | C      | 2      | 3    | 4   | 5    | 6    |
| pH; AP                | D      | 2      | 3    | 4   | 5    | 6    |

  

| Source            | Sum of Squares | df | Mean Square | F-Value | p-value Prob > F |                 |
|-------------------|----------------|----|-------------|---------|------------------|-----------------|
| Model             | 10.89          | 14 | 0.78        | 19.48   | < 0.0001         | significant     |
| A-Voltage         | 0.08           | 1  | 0.08        | 2       | 0.1825           |                 |
| B-Extraction time | 0.019          | 1  | 0.019       | 0.46    | 0.5086           |                 |
| C-pH; DP          | 0.024          | 1  | 0.024       | 0.6     | 0.452            |                 |
| D-pH; AP          | 2.86           | 1  | 2.86        | 71.74   | < 0.0001         |                 |
| AB                | 0.051          | 1  | 0.051       | 1.29    | 0.2786           |                 |
| AC                | 0.54           | 1  | 0.54        | 13.5    | 0.0032           |                 |
| AD                | 0.024          | 1  | 0.024       | 0.61    | 0.4508           |                 |
| BC                | 0.85           | 1  | 0.85        | 21.17   | 0.0006           |                 |
| BD                | 0.43           | 1  | 0.43        | 10.8    | 0.0065           |                 |
| CD                | 0.26           | 1  | 0.26        | 6.62    | 0.0244           |                 |
| A <sup>2</sup>    | 0.13           | 1  | 0.13        | 3.22    | 0.0982           |                 |
| B <sup>2</sup>    | 0.16           | 1  | 0.16        | 3.92    | 0.071            |                 |
| C <sup>2</sup>    | 0.29           | 1  | 0.29        | 7.21    | 0.0198           |                 |
| D <sup>2</sup>    | 3.3            | 1  | 3.3         | 82.76   | < 0.0001         |                 |
| Residual          | 0.48           | 12 | 0.04        |         |                  |                 |
| Lack of Fit       | 0.44           | 10 | 0.044       | 2.3     | 0.3404           | not significant |
| Pure Error        | 0.038          | 2  | 0.019       |         |                  |                 |
| Cor Total         | 11.37          | 26 |             |         |                  |                 |

**Table 2S**

Comparison of PGE with other modified electrodes presented for electrochemical determination of CLZ.

| Electrode                            | Method              | Linearity <sup>a</sup>  | LOD <sup>a</sup> | Ref.      |
|--------------------------------------|---------------------|-------------------------|------------------|-----------|
| EPGCE <sup>b</sup>                   | DPV <sup>c</sup>    | 0.1-1<br>1-10<br>10-100 | 0.008            | 1         |
| HRP/CPE <sup>d</sup>                 | CV <sup>e</sup>     | 1-10                    | 0.17             | 2         |
| MHA/Au <sup>f</sup>                  | DPV                 | 1-50                    | 0.007            | 3         |
| TiO <sub>2</sub> NP/GCE <sup>g</sup> | AD-DPV <sup>h</sup> | 0.5-45                  | 0.061            | 4         |
| PPY/CNT/GCE <sup>i</sup>             | LSW <sup>j</sup>    | 0.01-0.4<br>0.4-5       | 0.003            | 5         |
| PGE <sup>k</sup>                     | DPV                 | 0.008-0.03<br>0.03-4.6  | 0.0027           | This work |

<sup>a</sup>All concentrations are based on  $\mu\text{M}$ , <sup>b</sup>Electrochemically pretreated glassy carbon, <sup>c</sup>Differential pulse voltammetry, <sup>d</sup>Horseradish peroxidase carbon paste electrode, <sup>e</sup>Cyclic voltammetry <sup>f</sup>16-Mercaptohexadecanoic acid, <sup>g</sup>TiO<sub>2</sub> nanoparticles, <sup>h</sup>Adsorptive differential pulse voltammetry, <sup>i</sup>Multiwalled carbon nanotubes/new coccine doped polypyrrole, <sup>j</sup>Linear sweep voltammetry, <sup>k</sup>pencil graphite electrode.

1. K. Farhadi and A. Karimpour, *Analytical sciences*, 2007, **23**, 479-483.
2. B. Blankert, O. Dominguez, W. El Ayyas, J. Arcos and J. M. Kauffmann, *Analytical letters*, 2005, **37**, 903-913.
3. F. Huang, S. Qu, S. Zhang, B. Liu and J. Kong, *Talanta*, 2007, **72**, 457-462.
4. M. H. Mashhadizadeh and E. Afshar, *Electrochimica Acta*, 2013, **87**, 816-823.
5. S. Shahrokhian, Z. Kamalzadeh and A. Hamzehloei, *Bioelectrochemistry*, 2013, **90**, 36-43.

**Figure 1S**

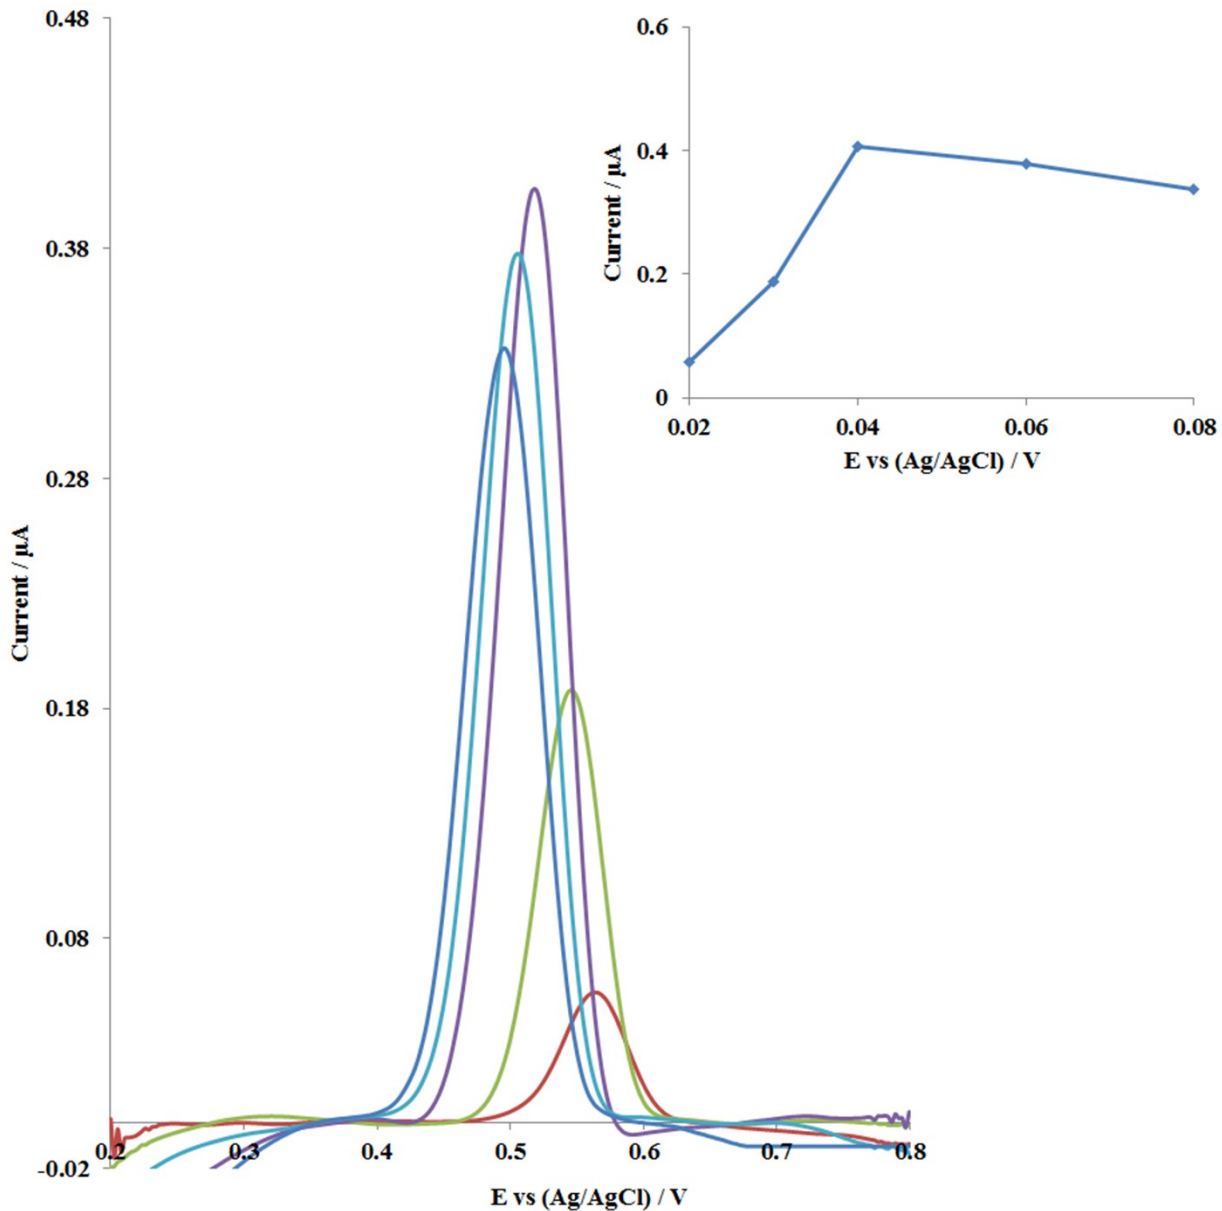

**Figure 1S.** DP voltammograms of 0.2  $\mu\text{g mL}^{-1}$  CLZ in 0.1 mM HCl on PGE for various modulation amplitudes: (a) 20 mV, (b) 30 mV, (c) 40 mV, (d) 60 mV and (e) 80 mV at scan rate of 10  $\text{mV s}^{-1}$ .

Figure 2S

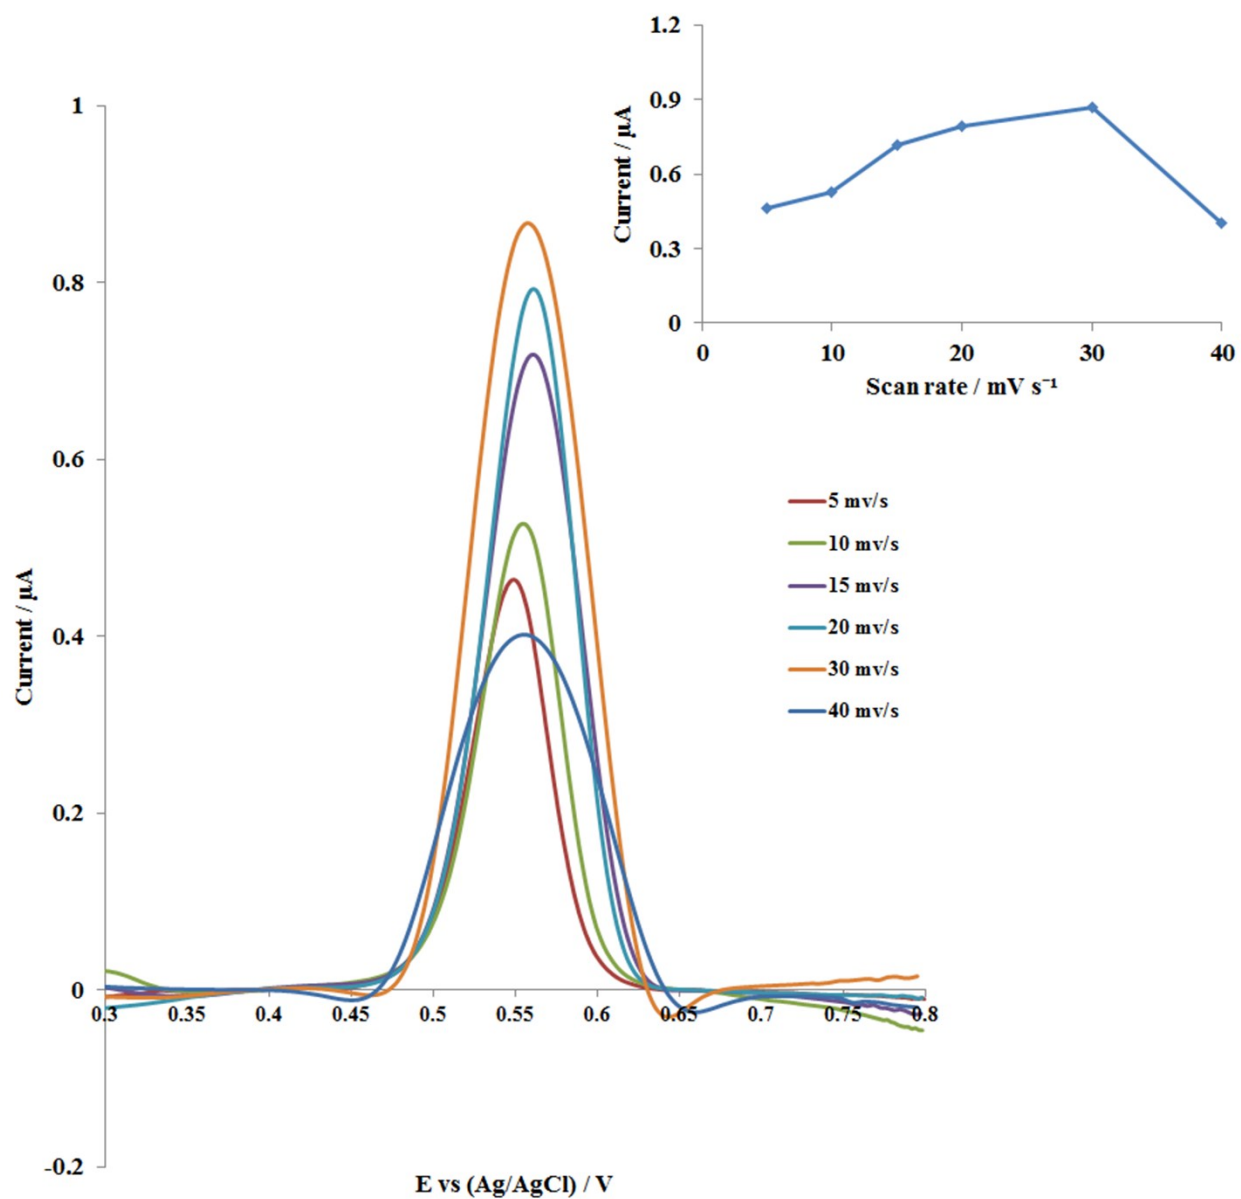

Figure 2S. DP voltammograms of 0.2  $\mu\text{g mL}^{-1}$  CLZ in 0.1 mM HCl on PGE for series of scan rates: (a) 5  $\text{mV s}^{-1}$ , (b) 10  $\text{mV s}^{-1}$ , (c) 15  $\text{mV s}^{-1}$ , (d) 20  $\text{mV s}^{-1}$ , (e) 30  $\text{mV s}^{-1}$  and (f) 40  $\text{mV s}^{-1}$ ; modulation amplitudes: 40 mV.

Figure 3S

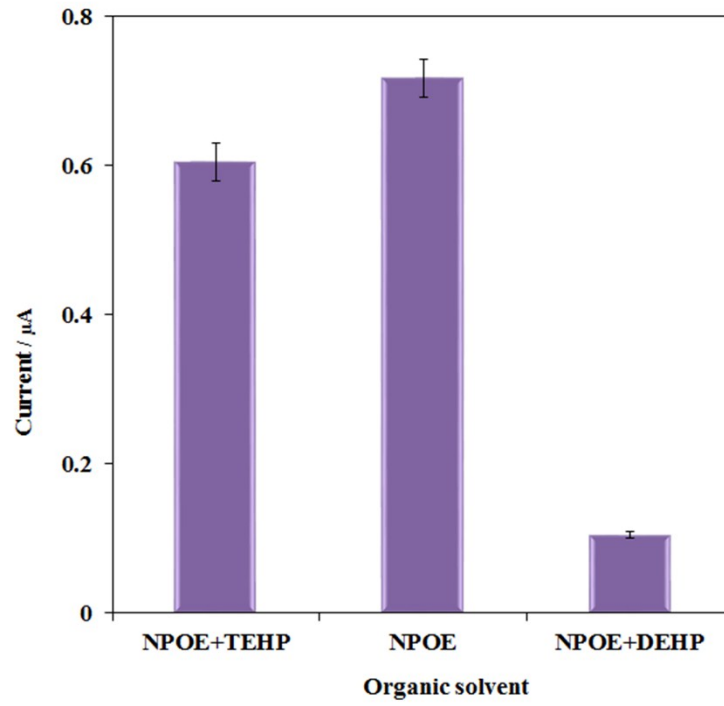

**Figure 3S.** Current of CLZ with different organic solvent as SLM.
